# Supplementary material for: Killer-cell Immunoglobulin-like Receptor (KIR) gene profiles modify HIV disease course, not HIV acquisition in South African women
Source: Springer Nature journal article supplement (doi:10.1186/s12879-016-1361-1), 2015-12-01

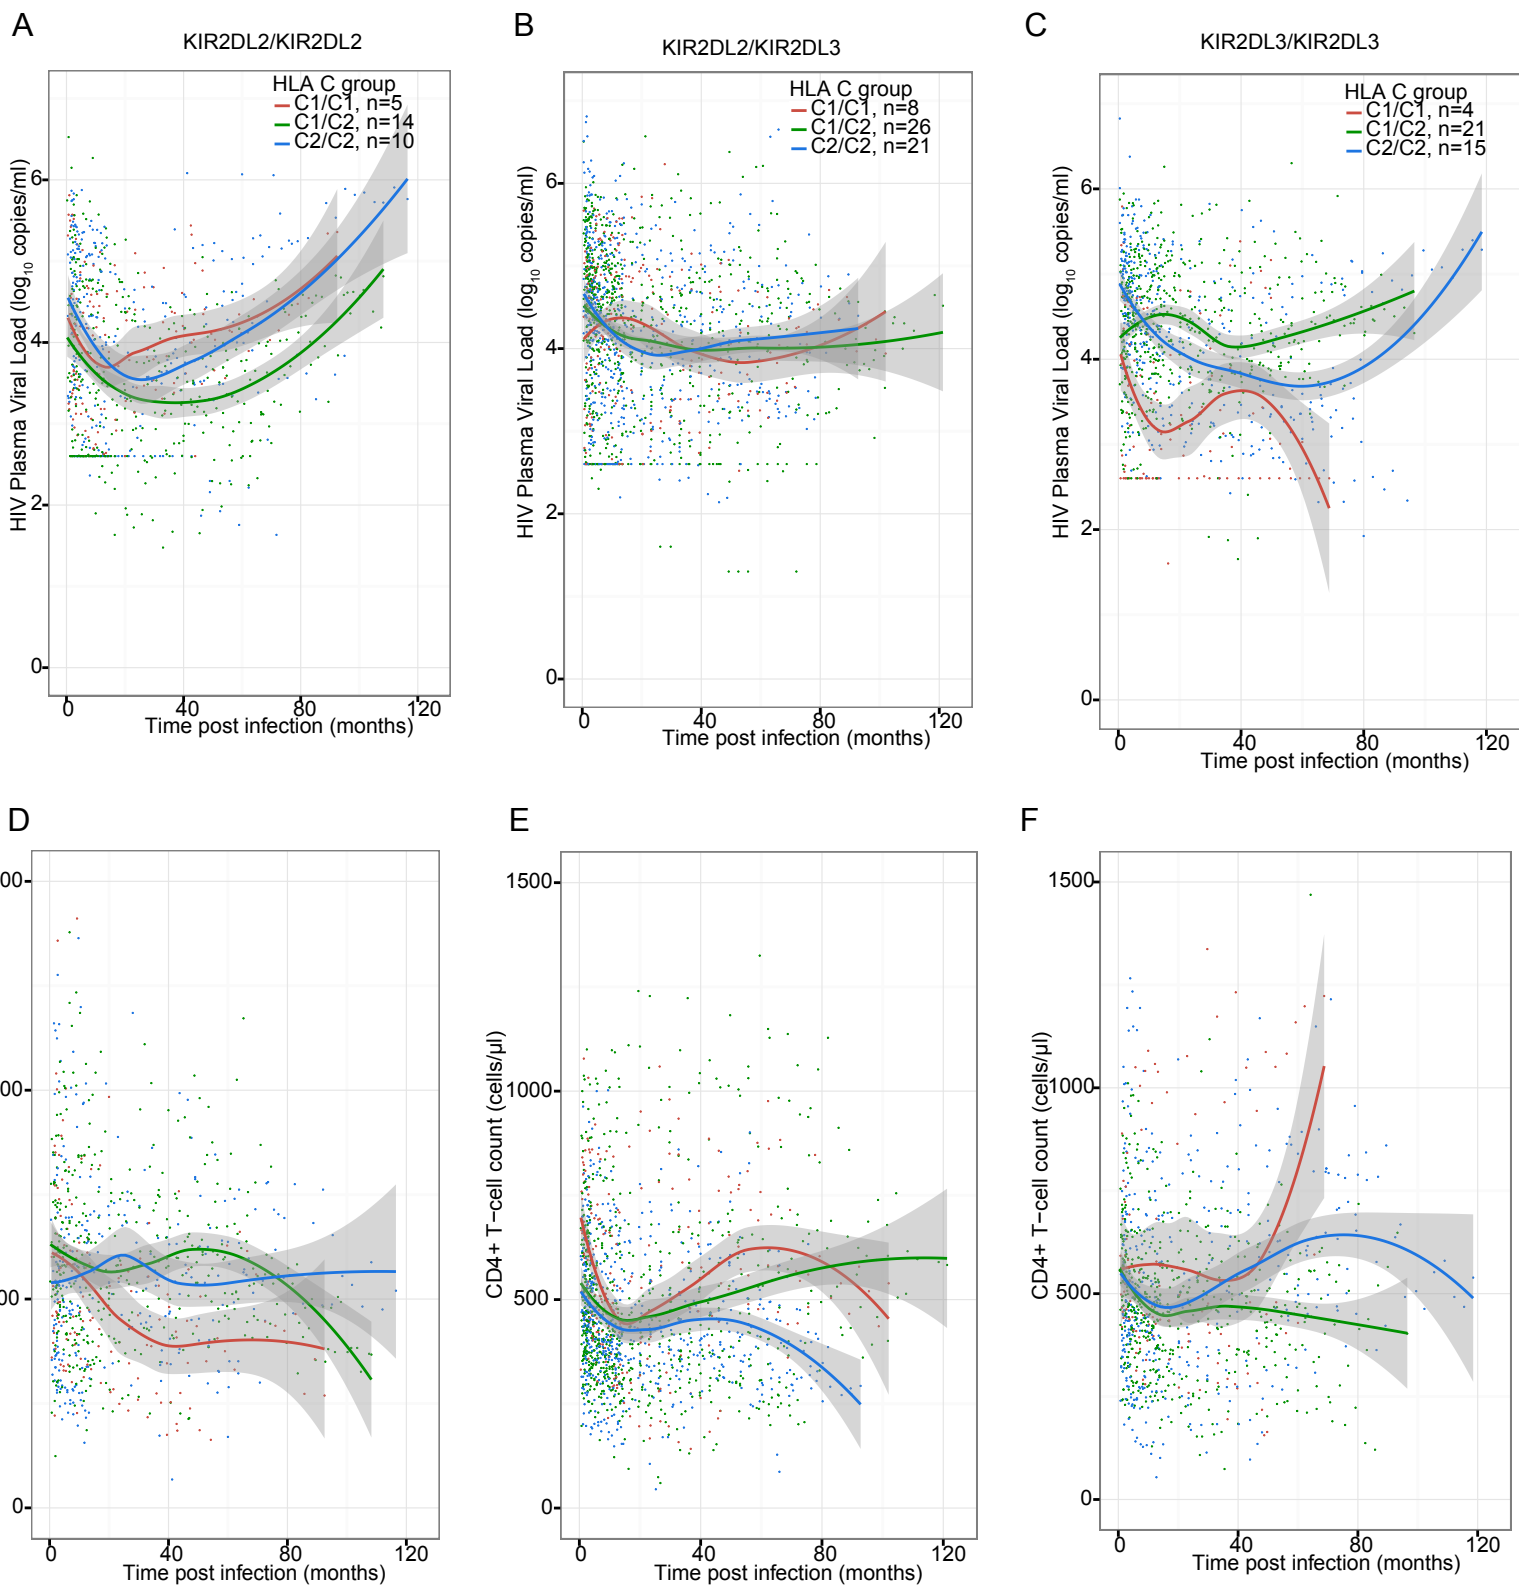

Supplement: MOESM6 [file 9740718]
